# Supplementary material for: Silvicultural Management System Applied to Logged Forests in the Brazilian Amazon: A Case Study of Adaptation of Techniques to Increase the Yield and Diversity of Species Forestry
Source: MDPI journal article supplement (doi:10.3390/d13110509), 2021-10-20
Supplement: s1 [file s1]

## Supplementary Materials

**Table S1.** Species (scientific name and common name) listed by market value group of criteria treatment in the forest census and trees selected for harvest and remaining trees with *dbh* ≥ 25. forest management area (535.6 ha) at Shet Farm. Dom Eliseu. Pará. Brazil.

| value group | Common name   | Scientific name                                      | Absolute tree | tree ha <sup>-1</sup> | tree % | Volume (m <sup>3</sup> ) | Production (m <sup>3</sup> ha <sup>-1</sup> ) | harvest trees | harvest trees ha <sup>-1</sup> | harvest trees % | harvest volume (m <sup>3</sup> ) |
|-------------|---------------|------------------------------------------------------|---------------|-----------------------|--------|--------------------------|-----------------------------------------------|---------------|--------------------------------|-----------------|----------------------------------|
| 1           | Angelim       | <i>Hymenolobium petraeum</i> Ducke                   | 132           | 0.25                  | 0.31   | 119.723                  | 0.224                                         | 5             | 0.01                           | 1.61            | 2.513                            |
|             | Canela        | <i>Nectandra</i> sp.                                 | 17            | 0.03                  | 0.04   | 22.198                   | 0.041                                         | 2             | 0.00                           | 0.65            | 0.912                            |
|             | Cedro         | <i>Cedrela odorata</i> L.                            | 42            | 0.08                  | 0.10   | 57.054                   | 0.107                                         | 2             | 0.00                           | 0.65            | 1.374                            |
|             | Copaíba       | <i>Copaifera</i> Ducke                               | 74            | 0.14                  | 0.17   | 124.669                  | 0.233                                         | 2             | 0.00                           | 0.65            | 1.254                            |
|             | Cumarú        | <i>Dipteryx odorata</i> (Aubl.) Willd.               | 290           | 0.54                  | 0.68   | 317.719                  | 0.593                                         | 6             | 0.01                           | 1.94            | 5.087                            |
|             | Freijó        | <i>Cordia goeldiana</i> Huber                        | 549           | 1.03                  | 1.28   | 707.839                  | 1.322                                         | 51            | 0.10                           | 16.45           | 44.869                           |
|             | Ipê           | <i>Handroanthus serratifolius</i> (Vahl)<br>S. Grose | 263           | 0.49                  | 0.62   | 370.876                  | 0.692                                         | 16            | 0.03                           | 5.16            | 12.266                           |
|             | Jatobá        | <i>Hymenaea courbaril</i> L.                         | 530           | 0.99                  | 1.24   | 806.074                  | 1.505                                         | 38            | 0.07                           | 12.26           | 27.280                           |
|             | Jatobá Curuba | <i>Hymenaea parvifolia</i> Huber                     | 12            | 0.02                  | 0.03   | 10.255                   | 0.019                                         |               | 0.00                           | 0.00            |                                  |
|             | Louro canela  | <i>Nectandra</i> sp.                                 | 624           | 1.17                  | 1.46   | 777.284                  | 1.451                                         | 90            | 0.17                           | 29.03           | 82.538                           |
|             | Maçaranduba   | <i>Manilkara elata</i> (Allemão ex Miq.) Monach.     | 308           | 0.58                  | 0.72   | 421.815                  | 0.788                                         | 45            | 0.08                           | 14.52           | 38.278                           |
|             | Muiracatiara  | <i>Astronium lecointei</i> Ducke                     | 182           | 0.34                  | 0.43   | 355.521                  | 0.664                                         | 13            | 0.02                           | 4.19            | 8.334                            |
|             | Roxinho       | <i>Peltogyne lecointei</i> Ducke                     | 465           | 0.87                  | 1.09   | 527.590                  | 0.985                                         | 56            | 0.10                           | 18.06           | 45.981                           |
|             | Tatajuba      | <i>Bagassa guianensis</i> Aubl.                      | 74            | 0.14                  | 0.17   | 94.864                   | 0.177                                         | 12            | 0.02                           | 3.87            | 8.190                            |

| value group | Common name           | Scientific name                                          | Absolute tree | tree ha <sup>-1</sup> | tree % | Volume (m <sup>3</sup> ) | Production (m <sup>3</sup> ha <sup>-1</sup> ) | harvest trees | harvest trees ha <sup>-1</sup> | harvest trees % | harvest volume (m <sup>3</sup> ) |
|-------------|-----------------------|----------------------------------------------------------|---------------|-----------------------|--------|--------------------------|-----------------------------------------------|---------------|--------------------------------|-----------------|----------------------------------|
| 2           | Amapá                 | <i>Brosimum guianense</i> (Aubl.) Huber                  | 16            | 0.03                  | 0.04   | 22.494                   | 0.042                                         |               | 0.00                           | 0.00            |                                  |
|             | Amarelão              | <i>Apuleia leiocarpa</i> (Vogel) J. F. Macbr.            | 17            | 0.03                  | 0.04   | 25.103                   | 0.047                                         | 1             | 0.00                           | 0.32            | 0.941                            |
|             | Amescla / Breu        | <i>Trattinnickia burseraefolia</i> Mart. Willd.          | 3171          | 5.92                  | 7.42   | 2710.566                 | 5.061                                         | 966           | 1.80                           | 311.61          | 612.141                          |
|             | Amesclão              | <i>Trattinnickia rhoifolia</i> Willd.                    | 15            | 0.03                  | 0.04   | 27.960                   | 0.052                                         | 1             | 0.00                           | 0.32            | 0.535                            |
|             | Amesclinha            | <i>Protium altissimum</i> (Aubl.)                        | 13            | 0.02                  | 0.03   | 8.390                    | 0.016                                         | 1             | 0.00                           | 0.32            | 0.422                            |
|             | Angico / Timborana    | <i>Pseudopiptadenia suaveolens</i> (Miq.) J. W. Grimes.  | 471           | 0.88                  | 1.10   | 519.835                  | 0.971                                         | 67            | 0.13                           | 21.61           | 52.364                           |
|             | Cajú                  | <i>Anacardium giganteum</i> W.Hancock ex Engl.           | 77            | 0.14                  | 0.18   | 85.963                   | 0.160                                         | 5             | 0.01                           | 1.61            | 4.531                            |
|             | Caneleiro / Pau-preto | <i>Cenostigma tocantinum</i> Ducke                       | 364           | 0.68                  | 0.85   | 398.187                  | 0.743                                         | 237           | 0.44                           | 76.45           | 251.142                          |
|             | Catuaba               | <i>Secondatia Lacmellea aculeata</i> (Ducke) Monach.     | 1             | 0.00                  | 0.00   | 0.713                    | 0.001                                         |               | 0.00                           | 0.00            |                                  |
|             | Cedrorana             | <i>Vochysia maxima</i> Ducke                             | 50            | 0.09                  | 0.12   | 70.713                   | 0.132                                         | 6             | 0.01                           | 1.94            | 3.901                            |
|             | Coco Pau              | <i>Coupeia robusta</i> Huber                             | 94            | 0.18                  | 0.22   | 152.462                  | 0.285                                         | 4             | 0.01                           | 1.29            | 4.290                            |
|             | Cupiúba               | <i>Goupia glabra</i> Aubl.                               | 79            | 0.15                  | 0.18   | 81.930                   | 0.153                                         | 9             | 0.02                           | 2.90            | 7.424                            |
|             | Embira quiabo / Axixá | <i>Sterculia pruriens</i> (Aubl.) K. Schum.              | 1018          | 1.90                  | 2.38   | 1166.011                 | 2.177                                         | 193           | 0.36                           | 62.26           | 157.706                          |
|             | Envira / Embira-preta | <i>Guatteria Guatteria punctata</i> (Aubl.) R. A. Howard | 166           | 0.31                  | 0.39   | 111.404                  | 0.208                                         | 26            | 0.05                           | 8.39            | 11.819                           |
|             | Escorrega Macaco      | <i>Albizia pedicellaris</i> (DC.) L. Rico                | 35            | 0.07                  | 0.08   | 59.653                   | 0.111                                         | 1             | 0.00                           | 0.32            | 1.040                            |

|                    |                                                                              |      |       |       |          |        |      |      |        |          |
|--------------------|------------------------------------------------------------------------------|------|-------|-------|----------|--------|------|------|--------|----------|
| Estopeiro          | <i>Couratari</i> sp. Aubl.                                                   | 22   | 0.04  | 0.05  | 33.406   | 0.062  | 1    | 0.00 | 0.32   | 0.810    |
| Farinha Seca       | <i>Ampelocera edentula</i> Kuhlm.                                            | 2    | 0.00  | 0.00  | 1.346    | 0.003  |      | 0.00 | 0.00   |          |
| Faveira            | <i>Parkia multijuga</i> Benth.                                               | 375  | 0.70  | 0.88  | 460.286  | 0.859  | 38   | 0.07 | 12.26  | 22.245   |
| Goiabão            | <i>Pouteria bilocularis</i> (H. K. A. Winkl.) Baehni                         | 601  | 1.12  | 1.41  | 907.215  | 1.694  | 16   | 0.03 | 5.16   | 11.609   |
| Guajará            | <i>Pouteria venosa</i> subsp. <i>amazonica</i> T. D. Penn                    | 312  | 0.58  | 0.73  | 463.986  | 0.866  | 23   | 0.04 | 7.42   | 18.874   |
| Inharé             | <i>Helicostylis pedunculata</i> Benoist                                      | 755  | 1.41  | 1.77  | 855.726  | 1.598  | 29   | 0.05 | 9.35   | 21.349   |
| Jarana             | <i>Lecythis lurida</i> (Miers) S. A. Mori                                    | 298  | 0.56  | 0.70  | 369.181  | 0.689  | 36   | 0.07 | 11.61  | 23.194   |
| Louro pimenta      | <i>Ocotea</i> sp.                                                            | 4    | 0.01  | 0.01  | 5.029    | 0.009  | 2    | 0.00 | 0.65   | 1.326    |
| Louro vermelho     | <i>Sextonia rubra</i> (Mez) van der Werff                                    | 2    | 0.00  | 0.00  | 3.158    | 0.006  | 1    | 0.00 | 0.32   | 0.482    |
| Mandiocão/morototó | <i>Didymopanax morototoni</i> (Aubl.) Decne. & Planch.)                      | 427  | 0.80  | 1.00  | 442.169  | 0.826  | 14   | 0.03 | 4.52   | 9.028    |
| Marupá             | <i>Simarouba amara</i> Aubl.                                                 | 369  | 0.69  | 0.86  | 412.907  | 0.771  | 23   | 0.04 | 7.42   | 16.841   |
| Moreira            | <i>Maclura tinctoria</i> (L.) D. Don ex Steud.                               | 1    | 0.00  | 0.00  | 1.785    | 0.003  |      | 0.00 | 0.00   |          |
| Orelha de macaco   | <i>Enterolobium schomburgkii</i> (Benth.) Benth.                             | 1    | 0.00  | 0.00  | 1.213    | 0.002  |      | 0.00 | 0.00   |          |
| Paricá             | <i>Schizolobium parahyba</i> var. <i>amazonicum</i> (Huber ex Ducke) Barneby | 6749 | 12.60 | 15.79 | 9008.619 | 16.820 | 1605 | 3.00 | 517.74 | 1982.682 |
| Pau santo          | <i>Zollernia paraensis</i> Huber                                             | 103  | 0.19  | 0.24  | 118.699  | 0.222  | 19   | 0.04 | 6.13   | 12.393   |
| Pequiá             | <i>Caryocar vilosum</i> (Aubl.) Pers.                                        | 383  | 0.72  | 0.90  | 388.080  | 0.725  | 14   | 0.03 | 4.52   | 8.300    |
| Pequiarana         | <i>Caryocar glabrum</i> (Aubl.) Pers.                                        | 24   | 0.04  | 0.06  | 29.795   | 0.056  | 1    | 0.00 | 0.32   | 1.379    |

|             |                                                   |     |      |      |         |       |     |      |       |         |
|-------------|---------------------------------------------------|-----|------|------|---------|-------|-----|------|-------|---------|
| Quina       | <i>Geissospermum sericeum</i> Miers               | 223 | 0.42 | 0.52 | 219.599 | 0.410 | 133 | 0.25 | 42.90 | 116.306 |
| Quina rosa  | <i>Quiina amazônica</i> A. C. Sm.                 | 2   | 0.00 | 0.00 | 1.212   | 0.002 |     | 0.00 | 0.00  |         |
| Sapucaia    | <i>Lecythis pisonis</i> Cambess.                  | 8   | 0.01 | 0.02 | 7.892   | 0.015 | 3   | 0.01 | 0.97  | 2.167   |
| Seringarana | <i>Ecclinusa guianensis</i> Eyma                  | 9   | 0.02 | 0.02 | 10.242  | 0.019 | 1   | 0.00 | 0.32  | 0.305   |
| Sumaúma     | <i>Ceiba pentandra</i> (L.) Gaertn.               | 2   | 0.00 | 0.00 | 2.066   | 0.004 |     | 0.00 | 0.00  |         |
| Tanibuca    | <i>Terminalia tanibouca</i> Rich.                 | 25  | 0.05 | 0.06 | 28.132  | 0.053 | 2   | 0.00 | 0.65  | 0.698   |
| Itaúba      | <i>Mezilaurus itauba</i> (Meisn.) Taub.<br>ex Mez | 105 | 0.20 | 0.25 | 160.599 | 0.300 | 16  | 0.03 | 5.16  | 20.319  |
| Tauari      | <i>Couratari</i> ssp.                             | 21  | 0.04 | 0.05 | 26.692  | 0.050 |     | 0.00 | 0.00  |         |
| Uxi         | <i>Endopleura uchi</i> (Huber) Cuatrec.           | 74  | 0.14 | 0.17 | 87.947  | 0.164 | 4   | 0.01 | 1.29  | 3.613   |

| value group | Common name                     | Scientific name                                             | Absolute tree | tree ha <sup>-1</sup> | tree % | Volume (m <sup>3</sup> ) | Production (m <sup>3</sup> ha <sup>-1</sup> ) | harvest trees | harvest trees ha <sup>-1</sup> | harvest trees % | harvest volume (m <sup>3</sup> ) |
|-------------|---------------------------------|-------------------------------------------------------------|---------------|-----------------------|--------|--------------------------|-----------------------------------------------|---------------|--------------------------------|-----------------|----------------------------------|
| 3           | Amarelinho                      | <i>Neoraputia paraensis</i> (Ducke)<br>Emmerich ex Kallunki | 588           | 1.10                  | 1.38   | 502.499                  | 0.938                                         | 48            | 0.09                           | 15.48           | 26.851                           |
|             | Andirobarana                    | <i>Guarea kunthiana</i> A. Juss.                            | 23            | 0.04                  | 0.05   | 26.644                   | 0.050                                         | 1             | 0.00                           | 0.32            | 0.614                            |
|             | Ata                             | <i>Annona</i> sp.                                           | 100           | 0.19                  | 0.23   | 71.220                   | 0.133                                         | 24            | 0.04                           | 7.74            | 18.077                           |
|             | Atraca / Caxinguba              | <i>Ficus</i> sp.                                            | 5             | 0.01                  | 0.01   | 5.191                    | 0.010                                         | 2             | 0.00                           | 0.65            | 1.352                            |
|             | Baço de boi                     | <i>Myrocarpus venezuelensis</i> Rudd.                       | 2             | 0.00                  | 0.00   | 1.392                    | 0.003                                         |               | 0.00                           | 0.00            |                                  |
|             | Bicuíba / Ucuúba-da-terra-firme | <i>Virola michelii</i> Heckel                               | 488           | 0.91                  | 1.14   | 537.437                  | 1.003                                         | 26            | 0.05                           | 8.39            | 20.974                           |
|             | Buranji                         | <i>Neea floribunda</i> Poepp. & Endl.                       | 13            | 0.02                  | 0.03   | 11.791                   | 0.022                                         | 3             | 0.01                           | 0.97            | 2.571                            |
|             | Cacau                           | <i>Theobroma speciosa</i> Willd. ex Spreng.                 | 8             | 0.01                  | 0.02   | 2.497                    | 0.005                                         | 3             | 0.01                           | 0.97            | 0.781                            |
|             | Cafezinho                       | -                                                           | 1             | 0.00                  | 0.00   | 1.941                    | 0.004                                         |               | 0.00                           | 0.00            |                                  |
|             | Caipoca                         | -                                                           | 124           | 0.23                  | 0.29   | 100.414                  | 0.187                                         | 11            | 0.02                           | 3.55            | 6.968                            |

| value group | Common name           | Scientific name                                                                                                            | Absolute tree | tree ha <sup>-1</sup> | tree % | Volume (m <sup>3</sup> ) | Production (m <sup>3</sup> ha <sup>-1</sup> ) | harvest trees | harvest trees ha <sup>-1</sup> | harvest trees % | harvest volume (m <sup>3</sup> ) |
|-------------|-----------------------|----------------------------------------------------------------------------------------------------------------------------|---------------|-----------------------|--------|--------------------------|-----------------------------------------------|---------------|--------------------------------|-----------------|----------------------------------|
|             | Canafístula           | <i>Senna multijuga</i> (Rich.) H. S. Irwin & Barneby                                                                       | 201           | 0.38                  | 0.47   | 193.676                  | 0.362                                         | 8             | 0.01                           | 2.58            | 4.682                            |
|             | Capa bode             | <i>Bauhinia acreana</i> Harms.                                                                                             | 7             | 0.01                  | 0.02   | 3.524                    | 0.007                                         | 1             | 0.00                           | 0.32            | 0.345                            |
|             | Capoeiro              | -                                                                                                                          | 43            | 0.08                  | 0.10   | 47.836                   | 0.089                                         | 21            | 0.04                           | 6.77            | 14.657                           |
|             | Casca Seca            | <i>Licania</i> sp. Aubl.                                                                                                   | 1             | 0.00                  | 0.00   | 3.275                    | 0.006                                         |               | 0.00                           | 0.00            |                                  |
|             | Condurú               | <i>Cynometra bauhiniifolia</i> Benth.                                                                                      | 194           | 0.36                  | 0.45   | 119.134                  | 0.222                                         | 10            | 0.02                           | 3.23            | 5.934                            |
|             | Cravinho / Goiabarana | <i>Myrcia paivae</i> O.Berg                                                                                                | 58            | 0.11                  | 0.14   | 41.736                   | 0.078                                         | 4             | 0.01                           | 1.29            | 2.064                            |
|             | Cumarupá              | -                                                                                                                          | 7             | 0.01                  | 0.02   | 4.193                    | 0.008                                         |               | 0.00                           | 0.00            |                                  |
|             | Embaúba               | <i>Cecropia distachya</i> Huber./ <i>C. sciadophylla</i> Mart./ <i>C. palmata</i> Willd./ <i>Pourouma guianensis</i> Aubl. | 6713          | 12.53                 | 15.70  | 4913.753                 | 9.174                                         | 1937          | 3.62                           | 624.84          | 1349.242                         |
|             | Freijó-branco         | <i>Cordia alliodora</i> (Ruiz & Pav.) Cham.)                                                                               | 953           | 1.78                  | 2.23   | 784.096                  | 1.464                                         | 124           | 0.23                           | 40.00           | 83.141                           |
|             | Gabirola              | <i>Campomanesia grandiflora</i> (Aubl.) Sagot                                                                              | 21            | 0.04                  | 0.05   | 9.141                    | 0.017                                         | 3             | 0.01                           | 0.97            | 0.856                            |
|             | Gema de ovo           | <i>Amphiodon effusus</i> Huber Poecilanthé                                                                                 | 351           | 0.66                  | 0.82   | 164.712                  | 0.308                                         | 223           | 0.42                           | 71.94           | 92.786                           |
|             | Goiabinha             | <i>Eugenia lambertiana</i> DC.                                                                                             | 526           | 0.98                  | 1.23   | 377.157                  | 0.704                                         | 30            | 0.06                           | 9.68            | 15.664                           |
|             | Ingá                  | <i>Inga</i> sp./ <i>Inga alba</i>                                                                                          | 2649          | 4.95                  | 6.20   | 1697.824                 | 3.170                                         | 1100          | 2.05                           | 354.84          | 528.802                          |
|             | Itaipoca              | -                                                                                                                          | 3             | 0.01                  | 0.01   | 2.359                    | 0.004                                         |               | 0.00                           | 0.00            |                                  |
|             | Jaca-braba            | <i>Abarema campestris</i> (Spruce ex Benth.) Barneby & J. W. Grimes                                                        | 1             | 0.00                  | 0.00   | 0.174                    | 0.000                                         |               | 0.00                           | 0.00            |                                  |

| value group | Common name              | Scientific name                                                   | Absolute tree | tree ha <sup>-1</sup> | tree % | Volume (m <sup>3</sup> ) | Production (m <sup>3</sup> ha <sup>-1</sup> ) | harvest trees | harvest trees ha <sup>-1</sup> | harvest trees % | harvest volume (m <sup>3</sup> ) |
|-------------|--------------------------|-------------------------------------------------------------------|---------------|-----------------------|--------|--------------------------|-----------------------------------------------|---------------|--------------------------------|-----------------|----------------------------------|
|             | Jacupemba                | -                                                                 | 1             | 0.00                  | 0.00   | 0.388                    | 0.001                                         | 1             | 0.00                           | 0.32            | 0.388                            |
|             | Jambo - Muúba            | <i>Bellucia grossularioides</i> (L.) Triana                       | 457           | 0.85                  | 1.07   | 325.589                  | 0.608                                         | 14            | 0.03                           | 4.52            | 7.190                            |
|             | Jiboião / Matamatá-preto | <i>Eschweilera grandiflora</i> (Aubl.) Sandwith                   | 180           | 0.34                  | 0.42   | 227.528                  | 0.425                                         | 13            | 0.02                           | 4.19            | 17.305                           |
|             | Jurema                   | <i>Senna polyphylla</i> (Jacq.) H. S. Irwin & Barneby             | 1             | 0.00                  | 0.00   | 0.384                    | 0.001                                         |               | 0.00                           | 0.00            |                                  |
|             | Juruparana               | <i>Gustavia augusta</i> L.                                        | 113           | 0.21                  | 0.26   | 61.500                   | 0.115                                         | 10            | 0.02                           | 3.23            | 4.549                            |
|             | Limãozinho               | <i>Zanthoxylum rhoifolia</i> Lam / <i>Z. ekmanii</i> (Urb.) Alain | 1196          | 2.23                  | 2.80   | 945.080                  | 1.765                                         | 186           | 0.35                           | 60.00           | 130.335                          |
|             | Mamuí                    | <i>Jacaratia spinosa</i> (Aubl.) A. DC. LC                        | 3436          | 6.42                  | 8.04   | 2232.528                 | 4.168                                         | 1007          | 1.88                           | 324.84          | 511.276                          |
|             | Mangue                   | <i>Buchenavia capitata</i> (Vahl) Eichler                         | 2             | 0.00                  | 0.00   | 0.747                    | 0.001                                         | 2             | 0.00                           | 0.65            | 0.747                            |
|             | Maria preta/Quina-branca | <i>Ziziphus cinnamomum</i> Triana & Planch.                       | 542           | 1.01                  | 1.27   | 504.648                  | 0.942                                         | 55            | 0.10                           | 17.74           | 32.849                           |
|             | Matamatá/matamata-jibóia | <i>Eschweilera ovata</i> (Cambess.) Mart. ex Miers                | 709           | 1.32                  | 1.66   | 658.488                  | 1.229                                         | 201           | 0.38                           | 64.84           | 131.634                          |
|             | Matraca                  | -                                                                 | 2             | 0.00                  | 0.00   | 1.576                    | 0.003                                         |               | 0.00                           | 0.00            |                                  |
|             | Mirindiba                | <i>Glycydendron amazonicum</i> Ducke                              | 1             | 0.00                  | 0.00   | 0.473                    | 0.001                                         |               | 0.00                           | 0.00            |                                  |
|             | Mirinji                  | -                                                                 | 13            | 0.02                  | 0.03   | 14.934                   | 0.028                                         |               | 0.00                           | 0.00            |                                  |
|             | Murtinha                 | -                                                                 | 13            | 0.02                  | 0.03   | 13.039                   | 0.024                                         |               | 0.00                           | 0.00            |                                  |
|             | Mutamba                  | <i>Guazuma ulmifolia</i> Lam.                                     | 149           | 0.28                  | 0.35   | 114.085                  | 0.213                                         | 37            | 0.07                           | 11.94           | 25.987                           |
|             | Pau canga                | -                                                                 | 1             | 0.00                  | 0.00   | 1.604                    | 0.003                                         |               | 0.00                           | 0.00            |                                  |
|             | Pau piranha              | -                                                                 | 7             | 0.01                  | 0.02   | 3.806                    | 0.007                                         | 3             | 0.01                           | 0.97            | 1.600                            |

| value group | Common name                 | Scientific name                                                                 | Absolute tree | tree ha <sup>-1</sup> | tree % | Volume (m <sup>3</sup> ) | Production (m <sup>3</sup> ha <sup>-1</sup> ) | harvest trees | harvest trees ha <sup>-1</sup> | harvest trees % | harvest volume (m <sup>3</sup> ) |
|-------------|-----------------------------|---------------------------------------------------------------------------------|---------------|-----------------------|--------|--------------------------|-----------------------------------------------|---------------|--------------------------------|-----------------|----------------------------------|
|             | Pau pombo                   | -                                                                               | 39            | 0.07                  | 0.09   | 50.278                   | 0.094                                         |               | 0.00                           | 0.00            |                                  |
|             | Pele de sapo / Arataciurana | <i>Pausandra trianae</i> (Müll. Arg.) Baill.                                    | 707           | 1.32                  | 1.65   | 337.327                  | 0.630                                         | 348           | 0.65                           | 112.26          | 139.902                          |
|             | Pitomba                     | <i>Talisia</i> sp.                                                              | 772           | 1.44                  | 1.81   | 686.803                  | 1.282                                         | 64            | 0.12                           | 20.65           | 42.188                           |
|             | Seringueira                 | <i>Hevea brasiliensis</i> (Willd. ex A Juss) Mull. Arg.                         | 10            | 0.02                  | 0.02   | 10.974                   | 0.020                                         | 3             | 0.01                           | 0.97            | 2.314                            |
|             | Tamburil                    | <i>Enterolobium maximum</i> Ducke                                               | 13            | 0.02                  | 0.03   | 13.842                   | 0.026                                         | 2             | 0.00                           | 0.65            | 2.491                            |
|             | Taxí / Taxí-branco          | <i>Tachigali vulgaris</i> L. G. Silva & H. C. Lima/ <i>Tachigali glauca</i> Tul | 206           | 0.38                  | 0.48   | 206.128                  | 0.385                                         | 29            | 0.05                           | 9.35            | 19.982                           |
|             | Tuturubá / Abiurana         | <i>Pouteria guianensis</i> Aubl.                                                | 1053          | 1.97                  | 2.46   | 1047.793                 | 1.956                                         | 310           | 0.58                           | 100.00          | 215.061                          |
| Group 1     |                             |                                                                                 | 3562          | 6.65                  | 8.33   | 4713.480                 | 8.800                                         | 338           | 0.63                           | 109.03          | 278.875                          |
| Gr Group 2  |                             |                                                                                 | 16484         | 30.78                 | 38.56  | 19488.365                | 36.386                                        | 3498          | 6.53                           | 1128.39         | 3382.176                         |
| Group 3     |                             |                                                                                 | 22703         | 42.39                 | 53.11  | 17083.159                | 31.895                                        | 5864          | 10.95                          | 1891.61         | 3462.159                         |
| Total       |                             |                                                                                 | 42749         | 79.82                 | 100.00 | 41285.004                | 77.082                                        | 9700          | 19.923                         | 100.0           | 7123.210                         |

Field (-) data not entered / information not found.

**Table S2.** Species (scientific name and common name) listed by market value group of control treatment in the forest census and trees selected for harvest and remaining trees with *dbh* ≥ 25, forest management area (535.6 ha) at Shet Farm, Dom Eliseu, Pará, Brazil.

| value group | Common name   | Scientific name                                   | Absolute tree | tree ha <sup>-1</sup> | tree % | Volume (m <sup>3</sup> ) | Production (m <sup>3</sup> ha <sup>-1</sup> ) | harvest trees | harvest trees ha <sup>-1</sup> | harvest trees % | harvest volume (m <sup>3</sup> ) |
|-------------|---------------|---------------------------------------------------|---------------|-----------------------|--------|--------------------------|-----------------------------------------------|---------------|--------------------------------|-----------------|----------------------------------|
| 1           | Angelim       | <i>Hymenolobium petraeum</i> Ducke                | 35            | 0.07                  | 0.26   | 77.078                   | 0.144                                         |               |                                |                 |                                  |
|             | Canela        | <i>Nectandra</i> sp.                              | 8             | 0.01                  | 0.06   | 16.339                   | 0.031                                         |               |                                |                 |                                  |
|             | Cedro         | <i>Cedrela odorata</i> L.                         | 30            | 0.06                  | 0.22   | 101.360                  | 0.189                                         |               |                                |                 |                                  |
|             | Copaíba       | <i>Copaifera</i> Ducke                            | 46            | 0.09                  | 0.34   | 142.105                  | 0.265                                         | 5             | 0.01                           | 0.44            | 0.062                            |
|             | Cumarú        | <i>Dipteryx odorata</i> (Aubl.) Willd.            | 99            | 0.18                  | 0.73   | 233.556                  | 0.436                                         | 7             | 0.01                           | 0.62            | 0.073                            |
|             | Freijó        | <i>Cordia goeldiana</i> Huber                     | 190           | 0.35                  | 1.39   | 441.693                  | 0.825                                         | 8             | 0.01                           | 0.71            | 0.066                            |
|             | Ipê           | <i>Handroanthus serratifolius</i> (Vahl) S. Grose | 115           | 0.21                  | 0.84   | 309.357                  | 0.578                                         | 10            | 0.02                           | 0.88            | 0.129                            |
|             | Jatobá        | <i>Hymenaea courbaril</i> L.                      | 307           | 0.57                  | 2.25   | 1056.836                 | 1.973                                         | 30            | 0.06                           | 2.65            | 0.442                            |
|             | Jatobá Curuba | <i>Hymenaea parvifolia</i> Huber                  | 4             | 0.01                  | 0.03   | 12.756                   | 0.024                                         |               |                                |                 |                                  |
|             | Louro canela  | <i>Nectandra</i> sp.                              | 357           | 0.67                  | 2.62   | 846.866                  | 1.581                                         | 62            | 0.12                           | 5.48            | 0.465                            |
|             | Maçaranduba   | <i>Manilkara elata</i> (Allemão ex Miq.) Monach.  | 156           | 0.29                  | 1.14   | 422.236                  | 0.788                                         | 34            | 0.06                           | 3.01            | 0.308                            |
|             | Muiracatiara  | <i>Astronium lecointei</i> Ducke                  | 118           | 0.22                  | 0.87   | 380.096                  | 0.710                                         | 11            | 0.02                           | 0.97            | 0.118                            |
|             | Roxinho       | <i>Peltogyne lecointei</i> Ducke                  | 171           | 0.32                  | 1.25   | 372.969                  | 0.696                                         | 16            | 0.03                           | 1.41            | 0.134                            |
|             | Tatajuba      | <i>Bagassa guianensis</i> Aubl.                   | 82            | 0.15                  | 0.60   | 341.546                  | 0.638                                         | 47            | 0.09                           | 4.16            | 0.483                            |



| value group | Common name           | Scientific name                                       | Absolute tree | tree ha <sup>-1</sup> | tree % | Volume (m <sup>3</sup> ) | Production (m <sup>3</sup> ha <sup>-1</sup> ) | harvest trees | harvest trees ha <sup>-1</sup> | harvest trees % | harvest volume (m <sup>3</sup> ) |
|-------------|-----------------------|-------------------------------------------------------|---------------|-----------------------|--------|--------------------------|-----------------------------------------------|---------------|--------------------------------|-----------------|----------------------------------|
| 2           | Amapá                 | <i>Brosimum guianense</i> (Aubl.) Huber               | 11            | 0.02                  | 0.08   | 26.431                   | 0.049                                         |               |                                |                 |                                  |
|             | Amarelão              | <i>Apuleia leiocarpa</i> (Vogel) J. F. Macbr.         | 10            | 0.02                  | 0.07   | 31.274                   | 0.058                                         |               |                                |                 |                                  |
|             | Amescla / Breu        | <i>Trattinnickia burseraefolia</i> Mart. Willd.       | 1936          | 3.61                  | 14.20  | 3133.010                 | 5.850                                         | 67            | 0.13                           | 5.92            | 0.530                            |
|             | Amesclão              | <i>Trattinnickia rhoifolia</i> Willd.                 | 18            | 0.03                  | 0.13   | 52.287                   | 0.098                                         |               |                                |                 |                                  |
|             | Amesclinha            | <i>Protium altissimum</i> (Aubl.)                     | 4             | 0.01                  | 0.03   | 7.828                    | 0.015                                         |               |                                |                 |                                  |
|             | Angico / Timborana    | <i>Pseudopiptadenia suaveolens</i> (Miq.) J.W.Grimes. | 317           | 0.59                  | 2.32   | 1016.435                 | 1.898                                         | 47            | 0.09                           | 4.16            | 0.710                            |
|             | Cajú                  | <i>Anacardium giganteum</i> W.Hancock ex Engl.        | 24            | 0.04                  | 0.18   | 60.461                   | 0.113                                         |               |                                |                 |                                  |
|             | Caneleiro / Pau-preto | <i>Cenostigma tocantinum</i> Ducke                    | 418           | 0.78                  | 3.06   | 1523.628                 | 2.845                                         | 33            | 0.06                           | 2.92            | 0.509                            |
|             | Cedrorana             | <i>Vochysia maxima</i> Ducke                          | 36            | 0.07                  | 0.26   | 102.960                  | 0.192                                         | 8             | 0.01                           | 0.71            | 0.078                            |
|             | Coco Pau              | <i>Coupeia robusta</i> Huber                          | 89            | 0.17                  | 0.65   | 365.126                  | 0.682                                         | 40            | 0.07                           | 3.54            | 0.446                            |
|             | Cupiúba               | <i>Goupia glabra</i> Aubl.                            | 34            | 0.06                  | 0.25   | 89.444                   | 0.167                                         |               |                                |                 |                                  |
|             | Embira quiabo / Axixá | <i>Sterculia pruriens</i> (Aubl.) K. Schum.           | 485           | 0.91                  | 3.56   | 1045.785                 | 1.953                                         |               |                                |                 |                                  |
|             | Envira / Embira-preta | <i>Guatteria punctata</i> (Aubl.) R. A. Howard        | 36            | 0.07                  | 0.26   | 50.315                   | 0.094                                         | 73            | 0.14                           | 6.45            | 0.542                            |
|             | Escorrega Macaco      | <i>Albizia pedicellaris</i> (DC.) L. Rico             | 34            | 0.06                  | 0.25   | 115.039                  | 0.215                                         | 11            | 0.02                           | 0.97            | 0.113                            |
|             | Estopeiro             | <i>Couratari</i> sp. Aubl.                            | 20            | 0.04                  | 0.15   | 73.702                   | 0.138                                         |               |                                |                 |                                  |
|             | Faveira               | <i>Parkia multijuga</i> Benth.                        | 229           | 0.43                  | 1.68   | 791.542                  | 1.478                                         | 39            | 0.07                           | 3.45            | 0.568                            |

| value group | Common name        | Scientific name                                                              | Absolute tree | tree ha <sup>-1</sup> | tree % | Volume (m <sup>3</sup> ) | Production (m <sup>3</sup> ha <sup>-1</sup> ) | harvest trees | harvest trees ha <sup>-1</sup> | harvest trees % | harvest volume (m <sup>3</sup> ) |
|-------------|--------------------|------------------------------------------------------------------------------|---------------|-----------------------|--------|--------------------------|-----------------------------------------------|---------------|--------------------------------|-----------------|----------------------------------|
| 2           | Goiabão            | <i>Pouteria bilocularis</i> (H.K.A.Winkl.) Baehni                            | 334           | 0.62                  | 2.45   | 1134.573                 | 2.118                                         | 34            | 0.06                           | 3.01            | 0.649                            |
|             | Guajará            | <i>Pouteria venosa</i> subsp. <i>amazonica</i> T. D. Penn                    | 227           | 0.42                  | 1.66   | 635.010                  | 1.186                                         | 60            | 0.11                           | 5.31            | 0.519                            |
|             | Inharé             | <i>Helicostylis pedunculata</i> Benoist                                      | 274           | 0.51                  | 2.01   | 719.443                  | 1.343                                         | 58            | 0.11                           | 5.13            | 0.453                            |
|             | Jarana             | <i>Lecythis lurida</i> (Miers) S. A. Mori                                    | 131           | 0.24                  | 0.96   | 421.570                  | 0.787                                         | 30            | 0.06                           | 2.65            | 0.361                            |
|             | Louro pimenta      | <i>Ocotea</i> sp.                                                            | 1             | 0.00                  | 0.01   | 3.137                    | 0.006                                         |               |                                |                 |                                  |
|             | Louro vermelho     | <i>Sextonia rubra</i> (Mez) van der Werff                                    | 1             | 0.00                  | 0.01   | 2.677                    | 0.005                                         |               |                                |                 |                                  |
|             | Mandiocão/morototó | <i>Didymopanax morototoni</i> (Aubl.) Decne. & Planch.)                      | 104           | 0.19                  | 0.76   | 274.573                  | 0.513                                         | 22            | 0.04                           | 1.95            | 0.189                            |
|             | Marupá             | <i>Simarouba amara</i> Aubl.                                                 | 100           | 0.19                  | 0.73   | 291.523                  | 0.544                                         | 24            | 0.04                           | 2.12            | 0.242                            |
|             | Moreira            | <i>Maclura tinctoria</i> (L.) D.Don ex Steud.                                | 1             | 0.00                  | 0.01   | 1.785                    | 0.003                                         |               |                                |                 |                                  |
|             | Paricá             | <i>Schizolobium parahyba</i> var. <i>amazonicum</i> (Huber ex Ducke) Barneby | 1854          | 3.46                  | 13.59  | 4348.855                 | 8.120                                         | 12            | 0.02                           | 1.06            | 0.152                            |
|             | Pau santo          | <i>Zollernia paraensis</i> Huber                                             | 77            | 0.14                  | 0.56   | 190.684                  | 0.356                                         | 16            | 0.03                           | 1.41            | 0.136                            |
|             | Pequiá             | <i>Caryocar vilosum</i> (Aubl.) Pers.                                        | 117           | 0.22                  | 0.86   | 276.603                  | 0.516                                         | 26            | 0.05                           | 2.30            | 0.202                            |
|             | Pequiarana         | <i>Caryocar glabrum</i> (Aubl.) Pers.                                        | 12            | 0.02                  | 0.09   | 43.805                   | 0.082                                         |               |                                |                 |                                  |
|             | Quina              | <i>Geissospermum sericeum</i> Miers                                          | 152           | 0.28                  | 1.11   | 567.485                  | 1.060                                         | 10            | 0.02                           | 0.88            | 0.120                            |
|             | Sapucaia           | <i>Lecythis pisonis</i> Cambess.                                             | 9             | 0.02                  | 0.07   | 22.953                   | 0.043                                         |               |                                |                 |                                  |
|             | Seringarana        | <i>Ecclinusa guianensis</i> Eyma                                             | 3             | 0.01                  | 0.02   | 6.350                    | 0.012                                         |               |                                |                 |                                  |

| value group | Common name | Scientific name                                | Absolute tree | tree ha <sup>-1</sup> | tree % | Volume (m <sup>3</sup> ) | Production (m <sup>3</sup> ha <sup>-1</sup> ) | harvest trees | harvest trees ha <sup>-1</sup> | harvest trees % | harvest volume (m <sup>3</sup> ) |
|-------------|-------------|------------------------------------------------|---------------|-----------------------|--------|--------------------------|-----------------------------------------------|---------------|--------------------------------|-----------------|----------------------------------|
| 2           | Sumaúma     | <i>Ceiba pentandra</i> (L.) Gaertn.            | 1             | 0.00                  | 0.01   | 1.092                    | 0.002                                         |               |                                |                 |                                  |
|             | Tanibuca    | <i>Terminalia tanibouca</i> Rich.              | 16            | 0.03                  | 0.12   | 39.139                   | 0.073                                         |               |                                |                 |                                  |
|             | Itaúba      | <i>Mezilaurus itauba</i> (Meisn.) Taub. ex Mez | 118           | 0.22                  | 0.87   | 448.790                  | 0.838                                         | 35            | 0.07                           | 3.09            | 0.438                            |
|             | Tauari      | <i>Couratari</i> ssp.                          | 11            | 0.02                  | 0.08   | 21.900                   | 0.041                                         |               |                                |                 |                                  |
|             | Uxi         | <i>Endopleura uchi</i> (Huber) Cuatrec.        | 26            | 0.05                  | 0.19   | 71.155                   | 0.133                                         |               |                                |                 |                                  |

| value group | Common name                     | Scientific name                                          | Absolute tree | tree ha <sup>-1</sup> | tree % | Volume (m <sup>3</sup> ) | Production (m <sup>3</sup> ha <sup>-1</sup> ) | harvest trees | harvest trees ha <sup>-1</sup> | harvest trees % | harvest volume (m <sup>3</sup> ) |
|-------------|---------------------------------|----------------------------------------------------------|---------------|-----------------------|--------|--------------------------|-----------------------------------------------|---------------|--------------------------------|-----------------|----------------------------------|
| 3           | Amarelinho                      | <i>Neoraputia paraensis</i> (Ducke) Emmerich ex Kallunki | 117           | 0.22                  | 0.86   | 230.459                  | 0.430                                         |               |                                |                 |                                  |
|             | Andirobarana                    | <i>Guarea kunthiana</i> A. Juss.                         | 2             | 0.00                  | 0.01   | 5.597                    | 0.010                                         |               |                                |                 |                                  |
|             | Ata                             | <i>Annona</i> sp.                                        | 30            | 0.06                  | 0.22   | 74.118                   | 0.138                                         |               |                                |                 |                                  |
|             | Atraca / Caxinguba              | <i>Ficus</i> sp.                                         | 13            | 0.02                  | 0.10   | 121.939                  | 0.228                                         |               |                                |                 |                                  |
|             | Bicuíba / Ucuúba-da-terra-firme | <i>Virola michelii</i> Heckel                            | 166           | 0.31                  | 1.22   | 338.742                  | 0.632                                         | 7             | 0.01                           | 0.62            | 0.043                            |
|             | Buranji                         | <i>Neea floribunda</i> Poepp. & Endl.                    | 9             | 0.02                  | 0.07   | 15.456                   | 0.029                                         |               |                                |                 |                                  |
|             | Cafezinho                       | -                                                        | 1             | 0.00                  | 0.01   | 1.941                    | 0.004                                         |               |                                |                 |                                  |
|             | Caipoca                         | -                                                        | 21            | 0.04                  | 0.15   | 51.594                   | 0.096                                         |               |                                |                 |                                  |
|             | Canafístula                     | <i>Senna multijuga</i> (Rich.) H.S.Irwin & Barneby       | 58            | 0.11                  | 0.43   | 108.238                  | 0.202                                         |               |                                |                 |                                  |
|             | Capoeiro                        | -                                                        | 23            | 0.04                  | 0.17   | 69.936                   | 0.131                                         |               |                                |                 |                                  |
|             | Casca Seca                      | <i>Licania</i> sp. Aubl.                                 | 3             | 0.01                  | 0.02   | 10.057                   | 0.019                                         |               |                                |                 |                                  |
|             | Condurú                         | <i>Cynometra bauhiniifolia</i> Benth.                    | 29            | 0.05                  | 0.21   | 40.879                   | 0.076                                         |               |                                |                 |                                  |

| value group | Common name              | Scientific name                                                                                                             | Absolute tree | tree ha <sup>-1</sup> | tree % | Volume (m <sup>3</sup> ) | Production (m <sup>3</sup> ha <sup>-1</sup> ) | harvest trees | harvest trees ha <sup>-1</sup> | harvest trees % | harvest volume (m <sup>3</sup> ) |
|-------------|--------------------------|-----------------------------------------------------------------------------------------------------------------------------|---------------|-----------------------|--------|--------------------------|-----------------------------------------------|---------------|--------------------------------|-----------------|----------------------------------|
| 3           | Cravinho / Goiabarana    | <i>Myrcia paivae</i> O.Berg                                                                                                 | 8             | 0.01                  | 0.06   | 15.558                   | 0.029                                         |               |                                |                 |                                  |
|             | Cumarupá                 | -                                                                                                                           | 1             | 0.00                  | 0.01   | 1.310                    | 0.002                                         |               |                                |                 |                                  |
|             | Embaúba                  | <i>Cecropia distachya</i> Huber. / <i>C. sciadophylla</i> Mart./ <i>C. palmata</i> Willd./ <i>Pourouma guianensis</i> Aubl. | 982           | 1.83                  | 7.20   | 1631.680                 | 3.046                                         | 80            | 0.15                           | 7.07            | 0.459                            |
|             | Freijó-branco            | <i>Cordia alliodora</i> (Ruiz & Pav.) Cham.)                                                                                | 190           | 0.35                  | 1.39   | 338.595                  | 0.632                                         | 7             | 0.01                           | 0.62            | 0.060                            |
|             | Gema de ovo              | <i>Amphiodon effusus</i> Huber<br>Poecilanthe                                                                               | 25            | 0.05                  | 0.18   | 29.664                   | 0.055                                         |               |                                |                 |                                  |
|             | Goiabinha                | <i>Eugenia lambertiana</i> DC.                                                                                              | 80            | 0.15                  | 0.59   | 141.396                  | 0.264                                         | 2             | 0.00                           | 0.18            | 0.011                            |
|             | Inajarana                | -                                                                                                                           | 1             | 0.00                  | 0.01   | 2.001                    | 0.004                                         |               |                                |                 |                                  |
|             | Ingá                     | <i>Inga</i> sp./ <i>Inga alba</i>                                                                                           | 472           | 0.88                  | 3.46   | 700.465                  | 1.308                                         | 15            | 0.03                           | 1.33            | 0.097                            |
|             | Itaipoca                 | -                                                                                                                           | 1             | 0.00                  | 0.01   | 6.025                    | 0.011                                         |               |                                |                 |                                  |
|             | Jambo - Muúba            | <i>Bellucia grossularioides</i> (L.) Triana                                                                                 | 60            | 0.11                  | 0.44   | 94.027                   | 0.176                                         |               |                                |                 |                                  |
|             | Jiboião / Matamatá-preto | <i>Eschweilera grandiflora</i> (Aubl.) Sandwith                                                                             | 93            | 0.17                  | 0.68   | 221.588                  | 0.414                                         | 10            | 0.02                           | 0.88            | 0.095                            |
|             | Juruparana               | <i>Gustavia augusta</i> L.                                                                                                  | 5             | 0.01                  | 0.04   | 7.650                    | 0.014                                         |               |                                |                 |                                  |
|             | Limãozinho               | <i>Zanthoxylum rhoifolia</i> Lam<br>/ <i>Z. ekmanii</i> (Urb.) Alain                                                        | 293           | 0.55                  | 2.15   | 446.521                  | 0.834                                         | 8             | 0.01                           | 0.71            | 0.041                            |
|             | Mamuí                    | <i>Jacaratia spinosa</i> (Aubl.) A. DC.<br>LC                                                                               | 617           | 1.15                  | 4.52   | 855.335                  | 1.597                                         |               |                                |                 |                                  |
|             | Mangaba                  | -                                                                                                                           | 1             | 0.00                  | 0.01   | 5.006                    | 0.009                                         |               |                                |                 |                                  |

| value group | Common name                 | Scientific name                                                                 | Absolute tree | tree ha <sup>-1</sup> | tree % | Volume (m <sup>3</sup> ) | Production (m <sup>3</sup> ha <sup>-1</sup> ) | harvest trees | harvest trees ha <sup>-1</sup> | harvest trees % | harvest volume (m <sup>3</sup> ) |
|-------------|-----------------------------|---------------------------------------------------------------------------------|---------------|-----------------------|--------|--------------------------|-----------------------------------------------|---------------|--------------------------------|-----------------|----------------------------------|
| 3           | Maria preta/Quina-branca    | <i>Ziziphus cinnamomum</i> Triana & Planch.                                     | 180           | 0.34                  | 1.32   | 334.077                  | 0.624                                         | 7             | 0.01                           | 0.62            | 0.066                            |
|             | Matamatá/matamata-jibóia    | <i>Eschweilera ovata</i> (Cambess.) Mart. ex Miers                              | 253           | 0.47                  | 1.86   | 514.417                  | 0.960                                         | 34            | 0.06                           | 3.01            | 0.236                            |
|             | Matraca                     | -                                                                               | 1             | 0.00                  | 0.01   | 4.367                    | 0.008                                         |               |                                |                 |                                  |
|             | Mirinji                     | -                                                                               | 4             | 0.01                  | 0.03   | 8.359                    | 0.016                                         |               |                                |                 |                                  |
|             | Mutamba                     | <i>Guazuma ulmifolia</i> Lam.                                                   | 29            | 0.05                  | 0.21   | 56.783                   | 0.106                                         |               |                                |                 |                                  |
|             | Pau piranha                 | -                                                                               | 2             | 0.00                  | 0.01   | 17.637                   | 0.033                                         |               |                                |                 |                                  |
|             | Pau pombo                   | -                                                                               | 18            | 0.03                  | 0.13   | 48.023                   | 0.090                                         |               |                                |                 |                                  |
|             | Pele de sapo / Arataciurana | <i>Pausandra trianae</i> (Müll.Arg.) Baill.                                     | 74            | 0.14                  | 0.54   | 104.235                  | 0.195                                         |               |                                |                 |                                  |
|             | Pitomba                     | <i>Talisia</i> sp.                                                              | 235           | 0.44                  | 1.72   | 506.997                  | 0.947                                         | 35            | 0.07                           | 3.09            | 0.272                            |
|             | Seringueira                 | <i>Hevea brasiliensis</i> (Willd. ex A Juss) Mull. Arg.                         | 8             | 0.01                  | 0.06   | 19.697                   | 0.037                                         |               |                                |                 |                                  |
|             | Tamburil                    | <i>Enterolobium maximum</i> Ducke                                               | 11            | 0.02                  | 0.08   | 28.833                   | 0.054                                         |               |                                |                 |                                  |
|             | Taxí / Taxí-branco          | <i>Tachigali vulgaris</i> L. G. Silva & H. C. Lima/ <i>Tachigali glauca</i> Tul | 107           | 0.20                  | 0.78   | 288.922                  | 0.539                                         | 35            | 0.07                           | 3.09            | 0.280                            |
|             | Tuturubá / Abiurana         | <i>Pouteria guianensis</i> Aubl.                                                | 427           | 0.80                  | 3.13   | 976.793                  | 1.824                                         | 16            | 0.03                           | 1.41            | 0.254                            |
| Group 1     |                             |                                                                                 | 1718          | 3.21                  | 12.60  | 4754.793                 | 8.878                                         | 230           | 0.43                           | 20.34           | 2.279                            |
| Group 2     |                             |                                                                                 | 7270          | 13.57                 | 53.31  | 18008.369                | 33.623                                        | 610           | 1.14                           | 53.93           | 6.518                            |
| Group 3     |                             |                                                                                 | 4650          | 8.68                  | 34.10  | 8474.919                 | 15.823                                        | 291           | 0.54                           | 25.73           | 2.353                            |
| Total       |                             |                                                                                 | 13638         | 25.46                 | 100.00 | 31238.081                | 58.324                                        | 1131          | 2.11                           | 100.00          | 11.151                           |

Field (-) data not entered / information not found.

**Table S3.** Species (scientific name and common name) listed description by market value group in the forest at Shet Farm. Dom Eliseu. Pará. Brazil.

| Value group | Common name | Scientific name                                   | Description                                                                                                                                                                                                                                                                                                                                                                                                                                                                                                                               |
|-------------|-------------|---------------------------------------------------|-------------------------------------------------------------------------------------------------------------------------------------------------------------------------------------------------------------------------------------------------------------------------------------------------------------------------------------------------------------------------------------------------------------------------------------------------------------------------------------------------------------------------------------------|
| 1           | Angelim     | <i>Hymenolobium petraeum</i> Ducke                | Tree 40-50 m tall and 80-100 cm in diameter, occasionally reaching 200 cm in diameter. It is a tree that develops a straight, cylindrical and dominant stem, found in the canopy of tropical dryland forests of northern South America. Its wood presents: basic density of 5.90 g/cm <sup>3</sup> , easy workability and is considered durable wood a very durable against decaying fungi; moderately resistant to marine borers and resistant to dry wood termites. This species occurs in Amazonas, Amapá, Pará, Roraima and Maranhão. |
|             | Canela      | <i>Nectandra</i> sp.                              | Wood that has medium density, coarse texture, irregularly glossy surface. Occurrence in Brazil: Amapá, Amazonas, Pará, Rondônia; Guyana, French Guiana and Suriname.                                                                                                                                                                                                                                                                                                                                                                      |
|             | Cedro       | <i>Cedrela odorata</i> L.                         | Tree with a straight cylindrical trunk that can reach 35 m in height and 150 cm in diameter. Classified as a large deciduous tree, late secondary species or pioneer species. Its wood is considered light, density of 0.39 g / cm <sup>3</sup> . It occurs throughout Brazil, in all plant formations.                                                                                                                                                                                                                                   |
|             | Copaíba     | <i>Copaifera</i> Ducke                            | It presents wood with heartwood and sapwood distinguished by color, reddish-brown heartwood, with darker veins, beige-pink sapwood; glossy surface; characteristic smell when freshly cut and imperceptible after drying, slightly astringent taste; medium density; straight or irregular grain; medium texture.                                                                                                                                                                                                                         |
|             | Cumarú      | <i>Dipteryx odorata</i> (Aubl.) Willd.            | It is a large tree species, reaching up to 30 m in height in the primary forest. The occurrence of <i>D. odorata</i> flowering is annual. Both for flowering and fruiting or phenological pattern is irregular and weak correlations with environmental factors. Cumarú wood has a basic density of 9.08 g / cm <sup>3</sup> and is considered difficult to work.                                                                                                                                                                         |
|             | Freijó      | <i>Cordia goeldiana</i> Huber                     | Tree 10-20 m tall and 40-60 cm in diameter. Classified as semideciduous, heliophyte or diffused light. It occurs almost exclusively inside dense primary forests. It blooms during the months of September-December and the fruits ripen from November-January. The wood is considered moderately heavy with a density of 0.59 g / cm <sup>3</sup> and has moderate resistance to attack by woody organisms. It occurs in the Amazon region, mainly in the state of Pará.                                                                 |
|             | Ipê         | <i>Handroanthus serratifolius</i> (Vahl) S. Grose | Tree with height of 8-20 m and diameter of 60-80 cm. Classified as deciduous, heliophyte, widely dispersed in secondary formations, such as capoeiras and capoeirões. Its dispersion is generally uniform and always very sparse. It blooms during the months of August-November and the fruits ripen from October-December. Its wood is considered heavy, hard and difficult to saw, changes a basic                                                                                                                                     |

|               |                                                  |  |                                                                                                                                                                                                                                                                                                                                                                                                                                                                                                                                                                                                                                         |
|---------------|--------------------------------------------------|--|-----------------------------------------------------------------------------------------------------------------------------------------------------------------------------------------------------------------------------------------------------------------------------------------------------------------------------------------------------------------------------------------------------------------------------------------------------------------------------------------------------------------------------------------------------------------------------------------------------------------------------------------|
|               |                                                  |  | density of 1.08 g / cm <sup>3</sup> , durable under any conditions. It occurs frequently in the Amazon region and sparsely from Ceará to São Paulo.                                                                                                                                                                                                                                                                                                                                                                                                                                                                                     |
| Jatobá        | <i>Hymenaea courbaril</i> L.                     |  | Tree 20-35 m tall and 80-120 cm in diameter. Classified as semi-deciduous, late secondary, or light climax. Its wood has a basic density of 0.76 g / cm <sup>3</sup> , considered difficult to work and highly resistant to termites and white and brown rot fungi, but susceptible to marine borers. Occurs in the Amazon, Caatinga, Cerrado, Atlantic Forest, Pantanal.                                                                                                                                                                                                                                                               |
| Jatobá Curuba | <i>Hymenaea parvifolia</i> Huber                 |  | Tree with a height of 20-35 m and diameter of 46-65 cm, considered to be emergent in the forest canopy. It belongs to the Fabaceae family and is a tree native to the Amazon basin, which occurs mainly in drier areas of central Brazil and the eastern region of the Amazon. It also occurs in coastal areas in the Brazilian states of Piauí and Maranhão and in the northeast of the state of Pará.                                                                                                                                                                                                                                 |
| Louro canela  | <i>Nectandra</i> sp.                             |  | It has medium density; right grain; coarse texture; irregularly glossy surface. Occurrence in Brazil: Amazon, Amapá, Amazonas, Pará, Rondônia; Guyana, French Guiana, Suriname.                                                                                                                                                                                                                                                                                                                                                                                                                                                         |
| Maçaranduba   | <i>Manilkara elata</i> (Allemão ex Miq.) Monach. |  | Trees with a height of 30-50 m that occupy the upper canopy. It belongs to the functional group of the climax species. Its wood is very heavy with basic density from 0.9 g / cm <sup>3</sup> to 1.04 g / cm <sup>3</sup> . Wood is very durable in contact with the ground and resistant to the attack of xylophagous agents, therefore with high natural durability and, therefore, it is mainly used in civil and naval construction. It is a native species, occurring in the states of Amazonas, Pará, Bahia and Espírito Santo, with phytogeographic domains in the Amazon and in the Atlantic Forest, in terra firme rainforests |
| Muiracatiara  | <i>Astronium lecointei</i> Ducke                 |  | Tree with height up to 25 meters and diameter up to 60 cm. Fruiting takes place from May to August. The wood has a Basic density of 8.10 g / cm <sup>3</sup> , considered very durable wood, not being attacked by insects or dry wood termites. Occurrence in the Amazon in Terra Firme Forest.                                                                                                                                                                                                                                                                                                                                        |
| Roxinho       | <i>Peltogyne lecointei</i> Ducke                 |  | The wood has a basic density of 7.4 g / cm <sup>3</sup> , considered to be highly resistant to attack by xylophagous organisms (rotting fungi and dry wood termites). It has low resistance to marine xylophagous organisms. Occurrence in the state of Pará in Terra Firme Forest and Ombrophilous Forest.                                                                                                                                                                                                                                                                                                                             |
| Tatajuba      | <i>Bagassa guianensis</i> Aubl.                  |  | Tree up to 35 m high and 180 cm in diameter. Flowering in Pará, especially in Curuá-una, occurs from August to September, and fruiting from January to February. Fruits annually and produces a large amount of seeds. The wood has a basic density of 6.83 g/cm <sup>3</sup> , considered durable in relation to its resistance to fungus attack, low resistance to bad weather. Its wood is classified as easy to be preserved. Occurs in the Amazon,                                                                                                                                                                                 |

|   |                    |                                                         |                                                                                                                                                                                                                                                                                                                                                                                                                                                                                                                                                                                                                                   |
|---|--------------------|---------------------------------------------------------|-----------------------------------------------------------------------------------------------------------------------------------------------------------------------------------------------------------------------------------------------------------------------------------------------------------------------------------------------------------------------------------------------------------------------------------------------------------------------------------------------------------------------------------------------------------------------------------------------------------------------------------|
|   |                    |                                                         | Cerrado and Pantanal in Terra Firme Forest, Ombrophilous Forest and Amazon Savanna                                                                                                                                                                                                                                                                                                                                                                                                                                                                                                                                                |
| 2 | Amapá              | <i>Brosimum guianense</i> (Aubl.) Huber                 | Tree with height up to 30 meters and diameter up to 70 cm. Classified as a semi-deciduous plant, a monoecious, lactescent, secondary species, exclusive to the Amazon and Atlantic rain forests.                                                                                                                                                                                                                                                                                                                                                                                                                                  |
|   | Amarelão           | <i>Apuleia leiocarpa</i> (Vogel) J. F. Macbr.           | Tree with a height of 25-35 m and a diameter of 60-90 cm in diameter. Classified as a deciduous, heliophyte or diffuse light plant. It blooms during the months of August-September with the plant completely stripped of foliage. The fruits ripen in January-February. However, they remain on the tree for many months. The wood is moderately heavy (density 0.83 g/cm <sup>3</sup> ), hard, easy to work, of long durability, and can be attacked by termites. It occurs in Pará up to Rio Grande do Sul, in the broadleaved semideciduous forest, and in the south of Bahia and Espírito Santo in the Atlantic Rain Forest. |
|   | Amescla / Breu     | <i>Trattinnickia burseraefolia</i> Mart. Willd.         | Tree with commercial height of 9 m and diameter at breast height 39.3 cm. Wood is widely used in heavy construction, light construction, civil construction, boats, sheets, musical instruments, boxes, crates, furniture, partitions and others. Occurs in upland forests; also in the high fields, where size, although reduced, prevails over the others.                                                                                                                                                                                                                                                                      |
|   | Amesclão           | <i>Trattinnickia rhoifolia</i> Willd.                   | Tree 8-16 m tall and 30-60 cm in diameter. Occurs in tropical rainforest, growing in areas not subject to seasonal flooding, favoring sandy soils of moderate fertility. It succeeds in full sun to moderate shade. A fast growing tree. Wood is moderately heavy, hard, compact, with moderate mechanical properties and not very durable. It is used in general construction, making simple furniture, moldings, boxes, tool handles, etc. Seed - best to sow as soon as it ripens in a sunny position in a nursery seedbed. A low germination rate can be expected, with the seed germinating within 60 - 90 days.             |
|   | Amesclinha         | <i>Protium altissimum</i> (Aubl.)                       | Occurrences in Acre, Amazonas, Amapá, Pará, Rondônia, Roraima, Tocantins, Maranhão, DF, Goiás, Mato Grosso.                                                                                                                                                                                                                                                                                                                                                                                                                                                                                                                       |
|   | Angico / Timborana | <i>Pseudopiptadenia suaveolens</i> (Miq.) J. W. Grimes. | Tree with a height of up to 50 meters. Wood with a light reddish-brown color, moderately heavy, hard to cut, difficult to work with for sawing and planing, but it receives good polishing and presents good resistance to attack by wood-eating organisms, such as fungi, termites and borers. Its occurrence is predominantly in the Amazon.                                                                                                                                                                                                                                                                                    |
|   | Cajú               | <i>Anacardium giganteum</i> W. Hancock ex Engl.         | Trees can reach 40 m in height and 200 cm in diameter. The species is used in agroforestry systems and has been explored in the Amazon. The volume of logs extracted in the State of Pará, from 2006 to 2016, was 71,265 m <sup>3</sup> . The wood is light,                                                                                                                                                                                                                                                                                                                                                                      |



|                       |                                                      |  |                                                                                                                                                                                                                                                                                                                                                                                                                                                                                               |
|-----------------------|------------------------------------------------------|--|-----------------------------------------------------------------------------------------------------------------------------------------------------------------------------------------------------------------------------------------------------------------------------------------------------------------------------------------------------------------------------------------------------------------------------------------------------------------------------------------------|
|                       |                                                      |  | with a density of 0.52 g/cm <sup>3</sup> and not very durable in contact with the ground. It is used for interiors and considered of high commercial value.                                                                                                                                                                                                                                                                                                                                   |
| Caneleiro / Pau-preto | <i>Cenostigma tocaninum</i> Ducke                    |  | Medium sized tree 10-20 m tall. The species belonging to the Fabaceae family, has reports of natural occurrence throughout the Amazon region and on public roads in Manaus and Belém. Its tortuous trunk, provided with longitudinal grooves, draws attention. It flowers all year round, with greater frequency in the less rainy season. It produces a large amount of viable seeds, in the dry period, these seeds can be stored, due to their characteristics of orthodox seeds.          |
| Catuaba               | <i>Secondatia lacmellea aculeata</i> (Ducke) Monach. |  | -                                                                                                                                                                                                                                                                                                                                                                                                                                                                                             |
| Cedrorana             | <i>Vochysia maxima</i> Ducke                         |  | It is one of the Amazon forest species with great potential, both for the quality of its wood and for its fast-growing and easy-to-handle silvicultural characteristics. The wood has a light pink heartwood, medium to coarse texture, basic density of 0.49 g/cm <sup>3</sup> .                                                                                                                                                                                                             |
| Coco Pau              | <i>Coupeia robusta</i> Huber                         |  | -                                                                                                                                                                                                                                                                                                                                                                                                                                                                                             |
| Cupiúba               | <i>Goupia glabra</i> Aubl.                           |  | Large tree 40 m high. The trunk is cylindrical and compact. tall tree (about 40 m), with black leaves, fallen close to the base of the plant and by the strong termite smell that gives off when cutting the trunk and also when it is wet. It occurs in Roraima, Amapá, Pará, Amazonas, Tocantins and Rondônia. It is found in Dense Ombrophilous Forest. It blooms for a long period of the year, but predominates during the months of October-November. Fruits ripen in December-January. |
| Embira quiabo / Axixá | <i>Sterculia pruriens</i> (Aubl.) K. Schum.          |  | Trees with a height of 7-40 m. Light wood with 0.50 g/cm <sup>3</sup> , grayish white heartwood, susceptible to the action of deteriorating fungi (blue stain) and subterranean termites and dry wood. Flowering occurs in October, November and February and fruiting in December, January and March to July. It occurs in Amapá, Pará, Amazonas, Acre, Roraima and Rondônia.                                                                                                                |
| Envira / Embira-preta | <i>Guatteria punctata</i> (Aubl.) R. A. Howard       |  | It is an evergreen shrub or tree that can grow from 1 to 45 meters in height. The shaft can vary from 5 to 75 cm in diameter. The tree is sometimes harvested from the wild for local use as food, medicine and a source of materials. Range: South America - Northern Brazil, Bolivia, Peru, Ecuador, Colombia, Venezuela, Guianas. Habitat: Tropical forest. In non-flooded lowlands, pre-montane or mountainous forest, often on clayey soil; at elevations of up to 2800 meters.          |
| Escorrega Macaco      | <i>Albizia pedicellaris</i> (DC.) L. Rico            |  | It is a semi-deciduous tree species native to Brazil belonging to the Fabaceae family that presents fast growth, being classified as pioneer. It has natural distribution in Brazil, Ecuador, French Guiana, Suriname, Venezuela. In Brazil, it occurs in the terra firme pluvial forest in the Amazon, Cerrado and Atlantic Forest, with wide                                                                                                                                                |

|              |                                                           |  |                                                                                                                                                                                                                                                                                                                                                                                                                                                                                                                                                                                                                                                                                                                                                 |
|--------------|-----------------------------------------------------------|--|-------------------------------------------------------------------------------------------------------------------------------------------------------------------------------------------------------------------------------------------------------------------------------------------------------------------------------------------------------------------------------------------------------------------------------------------------------------------------------------------------------------------------------------------------------------------------------------------------------------------------------------------------------------------------------------------------------------------------------------------------|
|              |                                                           |  | geographic distribution. The seeds have physical dormancy, caused by the impermeability of the tegument.                                                                                                                                                                                                                                                                                                                                                                                                                                                                                                                                                                                                                                        |
| Estopeiro    | <i>Couratari</i> sp. Aubl.                                |  | Wood with medium density, soft to the cut, straight grain, medium texture. It has a heartwood and sapwood indistinct by color; creamy white to light yellowish beige; moderate brightness; variable odor from barely noticeable to noticeable, in this case unpleasant, slightly bitter taste. It occurs in the Amazon, Guyana, French Guiana and Suriname.                                                                                                                                                                                                                                                                                                                                                                                     |
| Farinha Seca | <i>Ampelocera edentula</i> Kuhlm.                         |  | 8-10m tall tree with yellow flowers. Its wood is heavy, hard to cut, heartwood/sapwood indistinct by color, yellowish heartwood, lackluster; imperceptible odor, coarse texture. It has provenance in Brazil, Pará, Óbidos Uchyzul Grande upland forest.                                                                                                                                                                                                                                                                                                                                                                                                                                                                                        |
| Faveira      | <i>Parkia multijuga</i> Benth.                            |  | Tree 20-30 m tall and 50-70 cm in diameter. Classified as an evergreen, heliophyte or sciophyte plant, characteristic of the terra firme forest in the Amazon region. It blooms during the months of August-October. Fruit maturation takes place in the November-December period. The wood is light with a density of 0.41 g/cm <sup>3</sup> , soft to the cut, of low resistance to the attack of xylophagous organisms, with indistinct sapwood, and is used only for plywood, boxes, toys, etc. It occurs in the Amazon region, in terra firme forest and high floodplains in clayey soil.                                                                                                                                                  |
| Goiabão      | <i>Pouteria bilocularis</i> (H. K. A. Winkl.) Baehni      |  | The species is found in evergreen seasonal forests. There is only confirmed occurrence of the species in the Amazon biome. Geographical Distribution: North (Acre, Amazonas, Pará, Rondônia, Roraima), Midwest (Mato Grosso). The species is evergreen, pioneer, heliophyte and has fast growth, mainly in open areas with high solar incidence. The wood has a basic density of around 0.75 g/cm <sup>3</sup> , medium texture, resistance to hard crosscutting, fine texture, easy workability, no smell or taste. The wood of the species is used in internal civil construction, beams, rafters, door cladding, decorative panels, linings, paneling, parquet, high quality furniture, decorative veneers, domestic utensils, turned parts. |
| Guajará      | <i>Pouteria venosa</i> subsp. <i>amazonica</i> T. D. Penn |  | Evergreen tree growing from 12 to 24 meters tall. It is native to northern South America. It can be found in Guyana, Suriname and Brazil                                                                                                                                                                                                                                                                                                                                                                                                                                                                                                                                                                                                        |
| Inharé       | <i>Helicostylis pedunculata</i> Benoist                   |  | -                                                                                                                                                                                                                                                                                                                                                                                                                                                                                                                                                                                                                                                                                                                                               |
| Jarana       | <i>Lecythis lurida</i> (Miers) S. A. Mori                 |  | Tree 12-18 m tall and 40-60 cm in diameter. Classified as an evergreen plant, occasionally semideciduous, heliophyte, characteristic of the terra firme forest of the Amazon region and the Atlantic rain forest. It blooms during the months of November-January. Fruits ripen in March-May. The wood is heavy (density 0.93 g/cm <sup>3</sup> ), and is suitable for external use, such as posts, posts, pegs and sleepers, for tool handles and other applications that require high strength. It occurs in the                                                                                                                                                                                                                              |

|  |                    |                                                                              |                                                                                                                                                                                                                                                                                                                                                                                                                                                                                                                                                                                                                                                                                  |
|--|--------------------|------------------------------------------------------------------------------|----------------------------------------------------------------------------------------------------------------------------------------------------------------------------------------------------------------------------------------------------------------------------------------------------------------------------------------------------------------------------------------------------------------------------------------------------------------------------------------------------------------------------------------------------------------------------------------------------------------------------------------------------------------------------------|
|  |                    |                                                                              | Amazon region, Espírito Santo, Minas Gerais (Vale do Rio Doce) and southern Bahia, in the rain forest.                                                                                                                                                                                                                                                                                                                                                                                                                                                                                                                                                                           |
|  | Louro pimenta      | <i>Ocotea</i> sp.                                                            | -                                                                                                                                                                                                                                                                                                                                                                                                                                                                                                                                                                                                                                                                                |
|  | Louro vermelho     | <i>Sextonia rubra</i> (Mez) van der Werff                                    | -                                                                                                                                                                                                                                                                                                                                                                                                                                                                                                                                                                                                                                                                                |
|  | Mandiocão/morototó | <i>Didymopanax morototoni</i> (Aubl.) Decne. & Planch.)                      | Tree 20-30 m tall and 60-80 cm in diameter. Classified as an evergreen, heliophyte or diffuse light plant, regardless of soil physical conditions, it is widely dispersed. It blooms from the end of August with the plant completely leafless, lasting until mid-October. Fruits ripen in April-July. The wood is very light with a density of 0.32 g/cm <sup>3</sup> and is indicated for the core of panels and doors, toys, heels for shoes, concrete forms, plywood, light and heavy boxes. It occurs in the North, Northeast, Midwest and South, with a predominance of the Amazon region.                                                                                 |
|  | Marupá             | <i>Simarouba amara</i> Aubl.                                                 | Trees with a height of 15-25 m and a diameter of 50-80 cm. Classified as a semi-deciduous, heliophyte, selective hygrophite plant. It can be found both inside the dense primary forest and in secondary formations, but always in low population density and with discontinuous dispersion. It blooms during the months of August-September and the fruits ripen in November-December. It features light wood with a density of 0.38 g/cm <sup>3</sup> , easy to work, not very compact, with low resistance to decay when exposed. It occurs in the Amazon region, southern Bahia, Espírito Santo and Rio de Janeiro.                                                          |
|  | Moreira            | <i>Maclura tinctoria</i> (L.) D. Don ex Steud.                               | Tree with height up to 25 m and diameter up to 90 cm. Classified as deciduous, heliophyte, early secondary species, light demanding climax. Flowering in August-October and fruiting in December-January. Used in civil construction such as beams and rafters, furniture manufacturing, turned parts; in shipbuilding, luxury joinery, bridge frameworks and sleepers. The wood has a Basic density of 7.30 g/cm <sup>3</sup> . The species occurs in the Semideciduous Seasonal Forest, Dense Ombrophilous Forest, from Amazonas to Rio Grande do Sul.                                                                                                                         |
|  | Orelha de macaco   | <i>Enterolobium schomburgkii</i> (Benth.) Benth.                             | Tree with a height of 10-50 m and diameter 12-80 cm in DBH. Classified as heliophile, it is native to the Amazon and has a wide geographic distribution in the neotropical area, occurring from Central America, Legal Amazon, Northeast, Southeast and South of Brazil, extending to Argentina, Uruguay, Paraguay and Bolivia. Heavy wood, with a density of 9.90 g/cm <sup>3</sup> . Its wood is used in civil construction in general, carpentry, joinery and finishing, floors, furniture, pallets, tool handles, turned parts, posts and pillars, sleepers, plywood, decorative laminates, blocks, door and window frames, beams, rafters, slats, boat frames, crosspieces. |
|  | Paricá             | <i>Schizolobium parahyba</i> var. <i>amazonicum</i> (Huber ex Ducke) Barneby | Tree 20-30 m tall and 60-80 cm in diameter. Classified as a deciduous, heliophile, pioneer and selective hygrophile plant. It blooms from late August, lasting until mid-October. Fruits ripen from April to July. Its wood is very light, with a density of 0.32                                                                                                                                                                                                                                                                                                                                                                                                                |

|             |                                       |  |                                                                                                                                                                                                                                                                                                                                                                                                                                                                                                                                                                                                                                                                                                              |
|-------------|---------------------------------------|--|--------------------------------------------------------------------------------------------------------------------------------------------------------------------------------------------------------------------------------------------------------------------------------------------------------------------------------------------------------------------------------------------------------------------------------------------------------------------------------------------------------------------------------------------------------------------------------------------------------------------------------------------------------------------------------------------------------------|
|             |                                       |  | g/cm <sup>3</sup> . Wood is indicated for panels, doors, toys, heels for shoes, plywood, box. It occurs from Bahia to Santa Catarina, in the Atlantic rain forest                                                                                                                                                                                                                                                                                                                                                                                                                                                                                                                                            |
| Pau santo   | <i>Zollernia paraensis</i> Huber      |  | It occurs in the State of Pará, Maranhão, Paraíba, Pernambuco and Mato Grosso. Height of 20.0m. Basic specific weight (g/cm <sup>3</sup> ): 0.90 to 1.00 – very heavy. Indicated uses: Luxury furniture, clubs, carpentry, crafts, turned objects, construction in general.                                                                                                                                                                                                                                                                                                                                                                                                                                  |
| Pequiá      | <i>Caryocar vilosum</i> (Aubl.) Pers. |  | Tree with a height of 20-45 m and a diameter of 90-180 cm in diameter. Evergreen or semideciduous plant, characteristic of the high forest of terra firme throughout the Amazon region. It blooms during the months of August-September. Fruits ripen from February to May. The wood is heavy with a density of 0.93 g/cm <sup>3</sup> and is highly resistant to the attack of xylophagous organisms. And this wood is used in shipbuilding, for making hulls of small boats, arches and wheel hubs, pylons, for exposed works, such as sleepers, posts, posts, stakes, etc.                                                                                                                                |
| Pequiarana  | <i>Caryocar glabrum</i> (Aubl.) Pers. |  | Canopy tree with heights ranging from 20-40 meters and width of 90-180 cm with deciduous or absent stipules.                                                                                                                                                                                                                                                                                                                                                                                                                                                                                                                                                                                                 |
| Quina       | <i>Geissospermum sericeum</i> Miers   |  | -                                                                                                                                                                                                                                                                                                                                                                                                                                                                                                                                                                                                                                                                                                            |
| Quina rosa  | <i>Quiina amazônica</i> A. C. Sm.     |  | Height of 15-25 m, with grooved and straight trunk, 40-60 cm in diameter. Simple, glabrous leaves, 5-8 cm long by 3-4 cm wide. Greenish flowers arranged in terminal inflorescences. Moderately heavy wood, hard, weak, easy to work, of low durability when exposed. Annually produces regular amount of viable seeds. It occurs in the Amazon up to the Bahian sertão, Goiás and Triangulo Mineiro, in the rain forest and Latifoliada Semidecidua, indifferent to the physical conditions of the soil, characteristic of the Amazon rainforest on terra firme. It is also found, but less frequently, in the semideciduous forest of Central Brazil, and in the high flooded forest of the Amazon region. |
| Sapucaia    | <i>Lecythis pisonis</i> Cambess.      |  | Tree 20-30 m tall and 50-90 cm in diameter. Classified as deciduous plant, heliophyte or sciophyte, selective hygrophyte. It blooms from mid-September along with the emergence of new pink or lilac leaves, lasting until mid-October. Fruits ripen from August to September. The wood is heavy and has a density of 0.88 g/cm <sup>3</sup> , suitable for external works, such as sleeper posts, posts, stakes, struts, bridges, masts, for civil constructions, etc. It occurs in the Amazon, Ceará to Rio de Janeiro, in the Atlantic rainforest and particularly frequent in southern Bahia and northern Espírito Santo.                                                                                |
| Seringarana | <i>Ecclinusa guianensis</i> Eyma      |  | -                                                                                                                                                                                                                                                                                                                                                                                                                                                                                                                                                                                                                                                                                                            |
| Sumaúma     | <i>Ceiba pentandra</i> (L.) Gaertn.   |  | Tree 30-40 m tall and 80-160 cm in diameter. Classified as deciduous plant, heliophyte, selective hygrophyte. It blooms in August-September with the tree almost completely stripped of foliage. Fruits ripen in October-November. The wood                                                                                                                                                                                                                                                                                                                                                                                                                                                                  |

|   |                                 |                                                          |                                                                                                                                                                                                                                                                                                                                                                                                                   |
|---|---------------------------------|----------------------------------------------------------|-------------------------------------------------------------------------------------------------------------------------------------------------------------------------------------------------------------------------------------------------------------------------------------------------------------------------------------------------------------------------------------------------------------------|
|   |                                 |                                                          | is light and has a density of 0.34 g/cm <sup>3</sup> , regular grain, medium texture, soft, with low natural durability. Wood is used in the construction of boats, for plywood core and pulp production. It occurs throughout the Amazon Basin, in the flooded forests or swamps of the river floodplains.                                                                                                       |
|   | Tanibuca                        | <i>Terminalia tanibouca</i> Rich.                        |                                                                                                                                                                                                                                                                                                                                                                                                                   |
|   | Itaúba                          | <i>Mezilaurus itauba</i> (Meisn.) Taub. ex Mez           | It belongs to the Lauraceae family and has very heavy and hard wood, with a density of 1.14 g/cm <sup>3</sup> , high mechanical strength and low shrinkage, high natural resistance to decay and insect attack. Thus, the wood of the species is very suitable for external constructions                                                                                                                         |
|   | Tauari                          | <i>Couratari</i> ssp.                                    | The genus <i>Couratari</i> is found in the Amazon where they occur. Its wood, in laboratory tests, when subjected to pressure treatment, proved to be permeable to preservative solutions. The wood has a basic density of 50.0 g/cm <sup>3</sup> , considered moderately soft to the cut, with a good finish, although the surface sometimes has a fuzzy appearance. Used in construction, furniture and others. |
|   | Uxi                             | <i>Endopleura uchi</i> (Huber) Cuatrec.                  | Tree with a straight, erect and cylindrical trunk, with a height of 25-30 m and a diameter of 60-90 cm.                                                                                                                                                                                                                                                                                                           |
| 3 | Amarelinho                      | <i>Neoraputia paraensis</i> (Ducke) Emmerich ex Kallunki | -                                                                                                                                                                                                                                                                                                                                                                                                                 |
|   | Andirobarana                    | <i>Guarea kunthiana</i> A. Juss.                         | Tree with height up to 20 m and diameter up to 60 cm. Classified as an evergreen plant, late secondary to climax. Flowering occurs from July-August and fruiting from September-November. It occurs in Semideciduous Seasonal Forest, and other Vegetation Formations, practically in all Brazilian territory. Used in civil construction.                                                                        |
|   | Ata                             | <i>Annona</i> sp.                                        | Upright tree 5-12 meters tall (when in the forest), with a slender, olive green to light brown trunk, measuring 10 to 40 cm in diameter.                                                                                                                                                                                                                                                                          |
|   | Atraca / Caxinguba              | <i>Ficus</i> sp.                                         | The wood in laboratory tests has been shown to have very low resistance to decay and to the attack of dry wood termites. It is considered to have moderate workability in planing and sanding operations. In operations that involve “drill” it presents an excellent finish. It has a density of 7.20 g/cm <sup>3</sup> . Occurs in the Midwest, Northeast, North, Southeast and South.                          |
|   | Baço de boi                     | <i>Myrocarpus venezuelensis</i> Rudd.                    | 20 meter tall tree. Its cylindrical trunk is from 60 to 90 centimeters in diameter. Its wood has a density of 0.87 to 0.89 g/cm <sup>3</sup> , it is considered a heavy wood. The wood is very resistant, has high and low durability.                                                                                                                                                                            |
|   | Bicuíba / Ucuúba-da-terra-firme | <i>Virola michelii</i> Heckel                            | This species belongs to the Myristicaceae family, reaches a height of up to 19 m with a straight, cylindrical trunk, sometimes fluted. It occurs in the northern region of Brazil, except in the states of Acre and Tocantins. It has distinct heartwood and sapwoods, light reddish-brown in color, with a medium to fine texture.                                                                               |

|                       |                                                                                                                             |                                                                                                                                                                                                                                                                                                                                                                                                                                                                                  |
|-----------------------|-----------------------------------------------------------------------------------------------------------------------------|----------------------------------------------------------------------------------------------------------------------------------------------------------------------------------------------------------------------------------------------------------------------------------------------------------------------------------------------------------------------------------------------------------------------------------------------------------------------------------|
| Buranji               | <i>Neea floribunda</i> Poepp. & Endl.                                                                                       | Trees 9-15 m high. It occurs in the Amazon biome including areas of Bolivia, Guyana, Peru and Brazil in the states of Acre, Amazonas, Pará and Rondônia.                                                                                                                                                                                                                                                                                                                         |
| Cacau                 | <i>Theobroma speciosa</i> Willd. ex Spreng.                                                                                 | -                                                                                                                                                                                                                                                                                                                                                                                                                                                                                |
| Cafezinho             | -                                                                                                                           | -                                                                                                                                                                                                                                                                                                                                                                                                                                                                                |
| Caipoca               | -                                                                                                                           | -                                                                                                                                                                                                                                                                                                                                                                                                                                                                                |
| Canafistula           | <i>Senna multijuga</i> (Rich.) H. S. Irwin & Barneby                                                                        | Tree with a height of 6-10m and a diameter of 30-40 cm. Classified as deciduous plant, heliophyte, pioneer, indifferent to the physical conditions of the soil, characteristics of secondary plants, scrub and scrub. Blooms during December - April. Fruit maturation takes place in April-June. Wood is light, soft, of low durability when exposed. It occurs in almost all of Brazil.                                                                                        |
| Capa bode             | <i>Bauhinia acreana</i> Harms.                                                                                              | It is medium sized, reaching 6 to 12 meters in height, but rarely exceeding 10 meters. The trunk is about 30 to 40 cm in diameter, is tortuous and usually has a short shaft.                                                                                                                                                                                                                                                                                                    |
| Capoeiro              | -                                                                                                                           | -                                                                                                                                                                                                                                                                                                                                                                                                                                                                                |
| Casca Seca            | <i>Licania</i> sp. Aubl.                                                                                                    | Tree from 8 to 20 m in height, with a globose crown with a width equal to half its height. The trunk is straight, growing from 30 to 65 cm in diameter.                                                                                                                                                                                                                                                                                                                          |
| Condurú               | <i>Cynometra bauhiniifolia</i> Benth.                                                                                       | Tree can reach 6-18 m in height. In general, Cynometra species have multiple uses (timber, reforestation, food, animal). The genus Cynometra L. has a pantropical distribution and has more than 80 known species. Among these, Cynometra bauhiniifolia Benth, has been recorded in Brazil, in the North, Northeast and Center-West regions.                                                                                                                                     |
| Cravinho / Goiabarana | <i>Myrcia paivae</i> O. Berg                                                                                                | Semideciduous tree, pioneer species, early secondary, light demanding climax. Its height reaches up to 18 m in height and 30 cm in diameter. Occurs in Seasonal Deciduous and Semideciduous Forest, Dense Ombrophilous Forest, Mixed Ombrophilous Forest.                                                                                                                                                                                                                        |
| Cumarupá              | -                                                                                                                           | Tree 20 to 25 meters tall.                                                                                                                                                                                                                                                                                                                                                                                                                                                       |
| Embaúba               | <i>Cecropia distachya</i> Huber. / <i>C. sciadophylla</i> Mart./ <i>C. palmata</i> Willd./ <i>Pourouma guianensis</i> Aubl. | Evergreen tree, dioecious, pioneer species. Its height reaches up to 15 m and its diameter up to 25 cm. Embaúbas are trees with a slender trunk and few branches, with most species reaching medium size (between 10 and 20 m in height). They belong to the pioneer group. In general, because they have a high tolerance to sunlight (heliophytes), ability to develop in relatively poor soils and fast growth. Trunk erect and cylindrical, fistulous, 20-30 cm in diameter. |
| Freijó-branco         | <i>Cordia alliodora</i> (Ruiz & Pav.) Cham.)                                                                                | Tree up to 15 m in height and 35 cm in diameter. Classified as subdeciduous to deciduous, heliophilic and monoecious. Wood is moderately heavy. It blooms throughout the months of May and June, with some of the old leaves still present. Fruits ripen about 2 months after flowering. It spreads from Mexico to northern Argentina, radiating through almost all the federative units in the North and Center-                                                                |

|                          |                                                                     |  |                                                                                                                                                                                                                                                                                                                                                                                                                                                                                                                                                                                                                                                                                            |
|--------------------------|---------------------------------------------------------------------|--|--------------------------------------------------------------------------------------------------------------------------------------------------------------------------------------------------------------------------------------------------------------------------------------------------------------------------------------------------------------------------------------------------------------------------------------------------------------------------------------------------------------------------------------------------------------------------------------------------------------------------------------------------------------------------------------------|
|                          |                                                                     |  | West regions of Brazil and reaching the states of Maranhão, Piauí, Bahia and Minas Gerais.                                                                                                                                                                                                                                                                                                                                                                                                                                                                                                                                                                                                 |
| Gabiroba                 | <i>Campomanesia grandiflora</i> (Aubl.) Sagot                       |  | -                                                                                                                                                                                                                                                                                                                                                                                                                                                                                                                                                                                                                                                                                          |
| Gema de ovo              | <i>Amphiodon effusus</i> Huber Poecilanthé                          |  | -                                                                                                                                                                                                                                                                                                                                                                                                                                                                                                                                                                                                                                                                                          |
| Goiabinha                | <i>Eugenia lambertiana</i> DC.                                      |  | -                                                                                                                                                                                                                                                                                                                                                                                                                                                                                                                                                                                                                                                                                          |
| Ingá                     | <i>Inga</i> sp. / <i>Inga alba</i>                                  |  | Tree that can reach 40 m in height. Wood suitable for firewood, handle for squeegee, broom, mop, vegetable and garden utensil, boat (defender and boat keel), parasol, coating in general (lining and panelling) and turning. Medium heavy wood, with a density of 0.61-0.69 g/cm <sup>3</sup> , moderately hard when manually cut in the transversal plane; reversed grain; medium to coarse texture. It blooms and bears fruit almost all year round. Occurs in the Brazilian Amazon: Amapá, Roraima, Maranhão, Pará, Amazonas, Tocantins, Rondônia and Acre.                                                                                                                            |
| Itaipoca                 | -                                                                   |  | -                                                                                                                                                                                                                                                                                                                                                                                                                                                                                                                                                                                                                                                                                          |
| Jaca-braba               | <i>Abarema campestris</i> (Spruce ex Benth.) Barneby & J. W. Grimes |  | -                                                                                                                                                                                                                                                                                                                                                                                                                                                                                                                                                                                                                                                                                          |
| Jacupemba                | -                                                                   |  | -                                                                                                                                                                                                                                                                                                                                                                                                                                                                                                                                                                                                                                                                                          |
| Jambo - Muúba            | <i>Bellucia grossularioides</i> (L.) Triana                         |  | Tree that can reach 7 m in height. A typical fruit species of primary and secondary vegetation of terra firme, distributed throughout the Amazon region.                                                                                                                                                                                                                                                                                                                                                                                                                                                                                                                                   |
| Jiboião / Matamatá-preto | <i>Eschweilera grandiflora</i> (Aubl.) Sandwith                     |  | Tree with height up to 35 m and diameter up to 90 cm. Classified as evergreen, cyophyte, climax species, present in the humid tropical forest, in the Lower Amazon region.                                                                                                                                                                                                                                                                                                                                                                                                                                                                                                                 |
| Jurema                   | <i>Senna polyphylla</i> (Jacq.) H. S. Irwin & Barneby               |  | -                                                                                                                                                                                                                                                                                                                                                                                                                                                                                                                                                                                                                                                                                          |
| Juruparana               | <i>Gustavia augusta</i> L.                                          |  | Tree up to 22 m in height and 20 to 30 cm in diameter. Occurring in the forests of the Guyanas and the Amazon, it is most commonly found on riverbanks and in habitats with waterlogged soil during a period of the year. Plant grown in other Brazilian states as ornamental.                                                                                                                                                                                                                                                                                                                                                                                                             |
| Limãozinho               | <i>Zanthoxylum rhoifolia</i> Lam / <i>Z. ekmanii</i> (Urb.) Alain   |  | Tree that can reach 15 m in height and 50 cm in diameter. It occurs naturally from the North and Midwest regions of Brazil to Mexico. The presence of growth rings (average width 1 cm), the wood cuts in the tangential and longitudinal planes present stripes that show its aesthetic beauty, which can be compared with the gray freijó wood. The wood has an average basic density of 500 g.cm <sup>-3</sup> , medium to moderate biological resistance (fungi and insects), low abrasiveness during the process of obtaining boards in a band saw, low cracking index in air drying and, also, in the veneer and wood panel industry, it presented good characteristics, both in the |

|                          |                                                    |  |                                                                                                                                                                                                                                                                                                                                                                                                                                                                                                                                                                                                                                                                                                                              |
|--------------------------|----------------------------------------------------|--|------------------------------------------------------------------------------------------------------------------------------------------------------------------------------------------------------------------------------------------------------------------------------------------------------------------------------------------------------------------------------------------------------------------------------------------------------------------------------------------------------------------------------------------------------------------------------------------------------------------------------------------------------------------------------------------------------------------------------|
|                          |                                                    |  | production of veneers for the cover and for the core, used in the manufacture of plywood.                                                                                                                                                                                                                                                                                                                                                                                                                                                                                                                                                                                                                                    |
| Mamuí                    | <i>Jacaratia spinosa</i> (Aubl.) A. DC. LC         |  | Tree with a height of 10-20 meters and diameter up to 90 cm. Classified as terrestrial, evergreen, dioecious, it presents phanelophilic pollination syndrome and zoochoric dispersion.                                                                                                                                                                                                                                                                                                                                                                                                                                                                                                                                       |
| Mangue                   | <i>Buchenavia capitata</i> (Vahl) Eichler          |  | Tree about 8 m. It is an emerging canopy tree naturally occurring in neotropical forests from 23° N to 23° S                                                                                                                                                                                                                                                                                                                                                                                                                                                                                                                                                                                                                 |
| Maria preta/Quina-branca | <i>Ziziphus cinnamomum</i> Triana & Planch.        |  | Tree with a height of 20-40 m and diameter up to 90 cm. It occurs in South America, in six countries: Peru, Ecuador, Colombia, Guyana, French Guiana, Bolivia, Brazil and Venezuela. In Brazil, the species distributes throughout the states of Pará, Amazonas, Acre and Maranhão, being found in terra firme forests.                                                                                                                                                                                                                                                                                                                                                                                                      |
| Matamata/matamata-jibóia | <i>Eschweilera ovata</i> (Cambess.) Mart. ex Miers |  | Tree with a diameter of 40-60 cm. Ecologically classified as: Climax. It is usually an evergreen tree, can grow from 4 to 19 meters in height. Flowering between September and December and fruiting between March and June. The tree is harvested from nature for local use for its edible seed and useful wood. Wood is also traded. An ornamental tree can be used in landscaping. It occurs naturally in the Atlantic Forest and Amazon in Ombrophilous/Pluvial forest and restinga;                                                                                                                                                                                                                                     |
| Matraca                  | -                                                  |  | -                                                                                                                                                                                                                                                                                                                                                                                                                                                                                                                                                                                                                                                                                                                            |
| Mirindiba                | <i>Glycydendron amazonicum</i> Ducke               |  | Tree originating in the Amazon. Wood with a density of 0.6 g/cm³. It has a commercial height of 10.00 m and a diameter of 63.9 cm.                                                                                                                                                                                                                                                                                                                                                                                                                                                                                                                                                                                           |
| Mirinji                  | -                                                  |  | -                                                                                                                                                                                                                                                                                                                                                                                                                                                                                                                                                                                                                                                                                                                            |
| Murtinha                 | -                                                  |  | -                                                                                                                                                                                                                                                                                                                                                                                                                                                                                                                                                                                                                                                                                                                            |
| Mutamba                  | <i>Guazuma ulmifolia</i> Lam.                      |  | Tree with height between 8 to 16 m and diameter of 30-50 cm. Straight to slightly crooked trunk, usually branched at low height. The crown is dense and wide, umbel shaped. Monopodial growth with thin branches and natural pruning does not occur. Flowering occurs from September to November. The ripening point of the fruits takes place between August and September. Although they are ripe, the fruits remain on the tree longer. The wood has low resistance to termite attack and little durability. There are records of the species in all states of Brazil. It also occurs in Argentina, Belize, Bolivia, Caribbean, Colombia, Costa Rica, Ecuador, El Salvador, Guatemala, French Guiana, Honduras and Mexico |
| Pau canga                | -                                                  |  | Tree with height up to 20 m and diameter up to 50 cm. Classified as a defenseless, deciduous, heliophile, monoecious plant. It presents slow growth and the maximum volumetric productivity registered is 5 m³/ha/year, at 10 years of age.                                                                                                                                                                                                                                                                                                                                                                                                                                                                                  |
| Pau piranha              | -                                                  |  | -                                                                                                                                                                                                                                                                                                                                                                                                                                                                                                                                                                                                                                                                                                                            |
| Pau pombo                | <i>Tapirira guianensis</i>                         |  | It is a non-endemic tree of the genus Tapirira, small, with a height of 8 to 20 meters. Its trunk is short and somewhat tortuous, with about 40 to 60 cm in diameter.                                                                                                                                                                                                                                                                                                                                                                                                                                                                                                                                                        |



|  |                             |                                                                                 |                                                                                                                                                                                                                                                                                                                                                                                                                                                                                                               |
|--|-----------------------------|---------------------------------------------------------------------------------|---------------------------------------------------------------------------------------------------------------------------------------------------------------------------------------------------------------------------------------------------------------------------------------------------------------------------------------------------------------------------------------------------------------------------------------------------------------------------------------------------------------|
|  |                             |                                                                                 | Classified as a kind of advanced successional stage and also an early-late secondary. Thus, <i>Tapirira guianensis</i> grows slowly early in life, being shade tolerant. On the other hand, it later accelerates growth in search of light in the forest canopy.                                                                                                                                                                                                                                              |
|  | Pele de sapo / Arataciurana | <i>Pausandra trianae</i> (Müll. Arg.) Baill.                                    | Tree with a height of 4-15 m. It is recognized by its reddish sap. Native to Colombia, Amazonia, Guayana and Serranía de La Macarena, Orinoquia.                                                                                                                                                                                                                                                                                                                                                              |
|  | Pitomba                     | <i>Talisia</i> sp.                                                              | -                                                                                                                                                                                                                                                                                                                                                                                                                                                                                                             |
|  | Seringueira                 | <i>Hevea brasiliensis</i> (Willd. ex A Juss) Mull. Arg.                         | Tree 20-30 m tall and 30-60 cm in diameter. Classified as a lactescent, semideciduous, heliophyte or sciophyte plant, characteristic of the Amazon rainforest of floodplains and, less frequently, of the terra firme forest. It blooms from August, lasting until early November. Fruits ripen from April to May. The wood is light with a density of 0.45 g/cm <sup>3</sup> , soft, of low natural durability and indistinct sapwood. It can be used for boards, linings and boxwork.                       |
|  | Tamburil                    | <i>Enterolobium maximum</i> Ducke                                               | Tree species, intolerant to shade, fast growing, reaching more than four meters in two years. The tree has a straight, cylindrical trunk, with an average commercial height of 14 m and a diameter of 65 cm. Shell thickness (cm): 1.0 – 2.0; smooth; contains tannin occurring in the forests of the region of Pará, Amazonas, Acre and Mato Grosso. Its wood has a basic density of 3.70 g/cm <sup>3</sup> , low durability to the attack of fungi, termites and dry wood insects.                          |
|  | Taxí / Taxí-branco          | <i>Tachigali vulgaris</i> L. G. Silva & H. C. Lima/ <i>Tachigali glauca</i> Tul | Tree can reach up to 30 m in height and 100 cm in diameter in adulthood. They are classified as pioneer and aggressive plants. Considered a moderately dense wood with a density of 0.65 g/cm <sup>3</sup> to 0.81 g/cm <sup>3</sup> . The species has a wide geographic distribution, occurring in the North (Pará, Amazonas and Tocantins), Northeast (Maranhão, Piauí, Ceará and Bahia), Midwest (Mato Grosso, Goiás, Federal District and Mato Grosso do Sul) and Southeast (São Paulo and Minas Gerais). |
|  | Tuturubá / Abiurana         | <i>Pouteria guianensis</i> Aubl.                                                | Northern Geographical Distribution (Acre, Amazonas, Amapá, Pará, Rondônia, Roraima) Northeast (Bahia) Midwest (Goiás, Mato Grosso) Southeast (Espírito Santo, Rio de Janeiro) Phytogeographic Domains Amazon, Cerrado, Atlantic Forest, flowering between July and November; Fruiting between December and April.                                                                                                                                                                                             |

Field (-) data not entered / information not found.
